# Longitudinal assessment of mycotoxin co-exposures in exclusively breastfed infants

Dominik Braun<sup>a</sup>, Eva Schernhammer<sup>b, c, d</sup>, Doris Marko<sup>a</sup>, Benedikt Warth<sup>a\*</sup>

<sup>a</sup>University of Vienna, Faculty of Chemistry, Department of Food Chemistry and Toxicology, Währinger Straße 38, 1090 Vienna, Austria

<sup>b</sup>Department of Epidemiology, Center for Public Health, Medical University of Vienna, Vienna, Austria

<sup>c</sup>Channing Division of Network Medicine, Harvard Medical School, Boston, MA, USA

<sup>d</sup>Department of Epidemiology, Harvard T.H. Chan School of Public Health, Boston, MA, USA

**KEYWORDS:** *Human biomonitoring (HBM); exposure assessment; food safety; exposome; infant, environmental and public health; natural contaminants.*

---

**ABSTRACT:** Early-life development of infants may be critically affected by man-made or natural contaminants including mycotoxins. However, data on the occurrence of food contaminants in breast milk is scarce and prohibits a comprehensive exposure and risk assessment for mothers and their infants.

Here, we present a longitudinal exposure assessment over the first 211 days of a single newborn girl (study A) by measuring multiple mycotoxins in milk. Eighty-seven consecutive breast milk samples were obtained from the newborn's mother living in Austria and following a regular mixed local diet. Mycotoxins were analyzed by utilizing a highly sensitive LC-MS/MS approach covering 29 mycotoxins and key metabolites. In addition to this longitudinal study, three mothers provided breast milk samples each on five consecutive days, for a preliminary comparison of inter-day and inter-individual variation in exposures (study B). Study A revealed that mycotoxin occurrence in breast milk was limited to the emerging mycotoxins alternariol monomethyl ether (AME), beauvericin (BEA), enniatins (A, A<sub>1</sub>, B, B<sub>1</sub>) and to ochratoxin A (OTA), which is regulated in commercial infant food. These mycotoxins were, if present, mostly detected at very low concentrations (<10 ng/L), except AME which exceeded this concentration on two distinct days by a factor of 3x and 5x. Overall, longitudinal results indicated chronic low-dose exposure to the detected mycotoxins. Other regulated mycotoxins including the carcinogenic aflatoxins or the estrogenic zearalenone and their biotransformation products were absent in all tested samples. Study B confirmed the results of study A, with minimal inter-day and inter-individual variation. Based on the data set obtained in study A, exposure of the infant was estimated. Exposure estimates of individual mycotoxins were on average below 1 ng/kg body weight per day.

Our findings suggest that exposure to mycotoxins in Austrian breast milk may be negligible. Recommended maximum daily intake levels were clearly not exceeded. However, exposure is likely to be higher in populations with lower food safety standards. In the light of co-occurrence of several emerging mycotoxins in breast milk, future studies should address low-dose mixture effects. This also includes other environmental contaminants which may be present in this bio-fluid and should involve an exposome-scale risk assessment. All these efforts must be intended to minimize exposure of mothers and infants in a window of high susceptibility.

---

## Introduction

Mycotoxins are naturally occurring toxic secondary metabolites produced by various fungi, including *Aspergillus*, *Fusarium*, *Penicillium* and *Alternaria* species. Toxicogenic fungi frequently contaminate agricultural crops pre- or postharvest in diverse environmental conditions (Bennett and Klich 2003). The ubiquitous occurrence of mycotoxins in the food chain has been shown in numerous reports over the last decades (Eskola *et al.* 2019; Schatzmayr and Streit 2013). Several *in vivo* studies documented harmful effects including immune suppression, target organ toxicity, genotoxicity or carcinogenicity. As a result, legislative regulations were introduced for the major mycotoxins and maximum tolerated limits (MTL) were implemented to control, measure and diminish their occurrence (EC 2006). Mycotoxins of legislative interest are aflatoxin B<sub>1</sub> (AFB<sub>1</sub>), AFB<sub>2</sub>, AFG<sub>1</sub>, AFG<sub>2</sub> and AFM<sub>1</sub> due to their known carcinogen-

ic effect. In addition to cancer, aflatoxins have also been linked to growth stunting in children and the suppression of immune responses (Gong *et al.* 2004; Gong *et al.* 2012; Turner *et al.* 2003). Of *Fusarium* derived mycotoxins, trichothecene deoxynivalenol (DON) has been shown to cause emesis and to inhibit protein biosynthesis (Beasley 2017; EFSA and Knudsen 2017). Zearalenone (ZEN) is known for its ability to bind to the estrogen receptor (Kowalska *et al.* 2018). Ochratoxin A (OTA) critically affects the kidney due to accumulation in the nephron (Malir *et al.* 2013), while exposure to fumonisins has been linked to esophageal cancer (Shirima *et al.* 2015). Despite their documented adverse effects, to date, few mycotoxins are regulated and monitored. In addition, so-called emerging mycotoxins like *Fusarium*-derived enniatins and beauvericin (BEA) or mycotoxins produced by *Alternaria*, e.g. alternariol and its monomethyl ether (AOH and AME) are

frequently detected in various food matrices (Puntscher *et al.* 2019). Most of these fungal secondary metabolites are toxicologically not fully characterized or data on their occurrence is lacking, hence, hindering proper risk assessment.

The concept of 'developmental origins of health and disease' (DOHaD) postulates that early-life exposures affect later-life health outcomes (Barker 2000; Bateson *et al.* 2004; Mandy and Nyirenda 2018). In general, infants are more vulnerable to the risks of mycotoxins as their detoxification capabilities are not fully developed and their intake of food is comparatively higher. In this critical time window of infancy, the WHO recommends to exclusively breastfeed newborns and infants for at least six months (Horta 2007). Breastfeeding is associated with numerous positive effects on both mother and child such as emotional bonding, tailored nutritional diet, uterine involution and the reduction of breast cancer risk (Jäger *et al.* 2014; Palmer *et al.* 2014). However, it may also pose unexpected risks: maternal exposure to food contaminants, such as mycotoxins, for example, may subject offspring not only to *in utero*, but also breast milk mycotoxins, thereby potentially increasing the risk for childhood and adulthood disease through gene x environment interactions or adverse epigenetic programming (Thornburg *et al.* 2010; Warth *et al.* 2019).

Currently, no clear data on excretion patterns of food contaminants in breast milk at different stages during breastfeeding exist (LaKind *et al.* 2018; Lehmann *et al.* 2018). To date, studies have mainly focused on AFM<sub>1</sub> and OTA, and they used enzyme linked immunosorbent assays (ELISA) or liquid chromatography coupled to fluorescence detection (LC-FD), both of which lack the specificity and sensitivity of state-of-the-art LC-MS systems as reviewed by Warth *et al.* (2016) and Sengling Cebin Coppa *et al.* (2019). Recently, we developed and validated two targeted LC-MS/MS assays to simultaneously assess multiple classes of mycotoxins in breast milk. The methods proved to be fit for purpose and allow the evaluation of these natural contaminants down to the pg/L range, enabling quantitative exposure assessment for infants even in countries with high food safety standards and low mycotoxin risk (Braun *et al.* 2018; Braun *et al.* 2020b).

Based on this technological progress, the primary aims of the presented experiments were a) to obtain longitudinal occurrence data of multiple mycotoxins in breast milk (study A) for estimating infant exposure and thus, ultimately in the future, associate childhood and adulthood disease risk; and b) to evaluate inter-day and inter-individual differences of mycotoxin co-occurrence patterns in a proof-of-principle experiment (study B).

## Materials and methods

### Chemicals and Reagents

Acetonitrile (ACN), methanol (MeOH) and water were purchased from Honeywell (Seelze, Germany). For sample preparation, ammonium acetate, formic acid, anhydrous magnesium sulfate, sodium chloride and formic acid were purchased from Sigma Aldrich (Vienna, Austria). The following toxins were purchased as reference material: Aflatoxin B<sub>1</sub> (AFB<sub>1</sub>), AFB<sub>2</sub>, AFG<sub>1</sub>, AFG<sub>2</sub>, deoxynivalenol (DON),

OTA, nivalenol (NIV), Sterigmatocystin (STC), fumonisin B<sub>1</sub> (FB<sub>1</sub>), FB<sub>2</sub>, T-2 toxin, alpha zearalenol ( $\alpha$ -ZEL),  $\beta$ -ZEL, alpha zearalanol ( $\alpha$ -ZAL),  $\beta$ -ZAL, zearalanone (ZAN) and ZEN from RomerLabs (Tulln, Austria); and aflatoxin metabolites AFM<sub>1</sub>, AFM<sub>2</sub>, AFP<sub>1</sub>, AFQ<sub>1</sub>, AFB<sub>1</sub>-N7-guanine adduct, as well as AME, AOH, beauvericin (BEA), Citrinin (CIT), HT-2 toxin, ochratoxin alpha (OT $\alpha$ ), ochratoxin B (OTB) from Toronto Research Chemicals (Ontario, Canada). Enniatin A (Enn A), Enn A<sub>1</sub>, Enn B, Enn B<sub>1</sub> and TEN were purchased from Sigma-Aldrich (Vienna, Austria). Dihydrocitrinone (DH-CIT) was kindly provided by Prof. Michael Sulyok (IFA-Tulln, Austria). Solid reference standards were dissolved in ACN to final concentrations of 5-500  $\mu$ g/mL as stock solutions. AFB<sub>1</sub>-N7-guanine was dissolved in ACN/H<sub>2</sub>O/acetic acid (75/24/1, v/v/v) according to manufacturer's instructions. The multi-toxin working solution containing all analytes was prepared by diluting individual stock solutions to concentrations of 36 - 17,000 ng/mL. <sup>13</sup>C-labelled reference standards of AFM<sub>1</sub>, CIT, DON, NIV, OTA and ZEN were purchased from RomerLabs (Tulln, Austria). A fresh mix of internal standards was prepared regularly reaching final concentrations of 0.1 - 4.5 ng/mL. All solutions and solid reference standards were stored at -20 °C.

### Breast milk samples

Human milk samples from two different experiments were investigated. In study A, longitudinal samples (n = 87) were provided by a lactating mother between July 2015 and January 2016. Breast milk was pumped into sample containers at the mother's home. Multiple samples collected at the same day, partly over two days, were combined to an aggregated sample. This was performed depending on the needs of the mother and her infant, and left-overs not consumed by the infant were mixed after at least two days during which the samples were stored at 4 °C. Thus, the mixed sample might not have been blended with the same volume of each meal. However, by this approach representative samples were obtained considering the dynamic nature of this bio-fluid. After combining multiple meal left-overs, samples were kept at -20 °C until analysis. On some days all breast milk was consumed by the infant leaving no sample for laboratory analysis. In study B, three mothers collected samples by manually expressing milk into containers at home each day on five consecutive days. Multiple samples collected at the same day were pooled and stored at -20 °C. Socio-demographic data for all mothers were recorded. Their age ranged between 25-32 years with a normal body mass index. Two participants were primiparous women, two had a high level of education (university degree), while all mothers earned a medium income. Throughout both studies all mothers maintained their regular mixed diet, thus, none was following vegetarian, vegan or special diet plans. The study was approved by the University of Vienna Ethics Committee under the authorization number #00157.

**Table 1.** Detailed descriptive statistics of mycotoxins detected in breast milk samples (n=87) obtained from a volunteer within 211 days after delivery (study A) and in breast milk samples (n=15) obtained from three volunteers on five consecutive days (study B).

| Study A (n=87)               | Positive samples |     | LOQ <sup>a</sup><br>ng/L | Concentration (ng/L) |      |        |
|------------------------------|------------------|-----|--------------------------|----------------------|------|--------|
|                              | n                | %   |                          | Range                | Mean | Median |
| Alternariol monomethyl ether | 78               | 90  | 1.0                      | 1.4 - 57.6           | 4.0  | 2.2    |
| Beauvericin                  | 87               | 100 | 0.3                      | 0.8 - 1.7            | 1.2  | 1.2    |
| Enniatin A                   | 4                | 5   | 1.0                      | <LOQ                 | -    | -      |
| Enniatin A <sub>1</sub>      | 1                | 1   | 1.8                      | <LOQ                 | -    | -      |
| Enniatin B                   | 87               | 100 | 1.3                      | <LOQ - 8.6           | 2.3  | 2.1    |
| Enniatin B <sub>1</sub>      | 41               | 47  | 1.0                      | <LOQ - 1.9           | 1.9  | 1.9    |
| Ochratoxin A                 | 87               | 100 | 1.5                      | <LOQ - 3.0           | 2.1  | 2.0    |

  

| Study B (n=15)               |    |     |     |            |     |     |
|------------------------------|----|-----|-----|------------|-----|-----|
| Alternariol monomethyl ether | 13 | 87  | 1.0 | 1.6 - 12   | 4.8 | 3.6 |
| Beauvericin                  | 15 | 100 | 0.3 | 0.8 - 2.9  | 1.3 | 1.2 |
| Enniatin A <sub>1</sub>      | 2  | 13  | 1.8 | <LOQ       | -   | -   |
| Enniatin B                   | 15 | 100 | 1.3 | 1.7 - 8.8  | 3.9 | 2.9 |
| Enniatin B <sub>1</sub>      | 10 | 67  | 1.0 | <LOQ - 1.5 | 1.3 | 1.3 |
| Ochratoxin A                 | 12 | 80  | 1.5 | <LOQ - 4.6 | 3.0 | 3.2 |

<sup>a</sup> Limit of quantification according to Braun *et al.* (2020b).

#### Sample preparation protocol and LC-MS/MS analysis

For mycotoxin analysis, the optimized protocol of Braun *et al.* (2020b) was used. In brief, samples were thawed, homogenized and 1 mL breast milk sample was extracted with 1 mL of acidified ACN (1% formic acid). After homogenization, anhydrous magnesium sulfate (0.4 g) and sodium chloride (0.1 g) were separately added and mixed. The upper layer (ACN, 950 µL) was transferred into a micro-reaction tube after a centrifugation step (4,750 x g, 10 min, 4 °C). This extract was chilled at -20 °C for 2 h following a second centrifugation step (14,000 x g, 2 min, 4 °C). The supernatant (900 µL ACN extract) was directly diluted in a H<sub>2</sub>O preloaded reservoir to 5% ACN and subsequently loaded to an Oasis PRiME HLB® solid phase extraction (SPE) column (1cc, 30 mg, Waters, Milford, MA). This column was equilibrated with 1 mL ACN and conditioned with 1 mL H<sub>2</sub>O/ACN (95/5, v/v) prior to sample loading. Following sample loading, the column was washed twice (5%ACN, 500 µL) and mycotoxins were eluted using neat ACN (three times 500 µL). This extract was evaporated to dryness using a vacuum concentrator (Labconco, Missouri, USA) and samples were reconstituted in 81 µL MeOH/ACN (50:50, v:v) and 9 µL of the internal standard mixture. After homogenization and ultrasonication (5 min), the samples were transferred to amber LC-vials and analyzed. Details of the LC-MS/MS method, including instrumental parameters and analytical figures thereof were reported in Braun *et al.* (2020b). In brief, the LC-MS/MS system consisted of an Agilent 1290 Infinity II LC system coupled to a Sciex QTrap® 6500+ mass spectrometer (Darmstadt, Germany). The MS was equipped with a Turbo-V™ electrospray ionization interface. Optimized chromatographic performance was achieved using an Acquity HSS T3 column (1.8 µm, 2.1x100 mm) guarded with a VanGuard pre-column (1.8 µm, Waters, Vienna, Austria) at a flow rate of 0.25 mL/min. A binary gradient elution was used consisting of an acidified ammonium acetate solution in water (5mM, acidified with 0.1% acetic acid; A) and MeOH (B). To baseline-separate all analytes of interest, a multi-step gradient was applied as follows:

Methanol was kept at 10% for the first 0.5 min, before increasing it to 35% within half a minute. Then, eluent B was linearly raised to 60% until 3.0 min and to 97% until 10.0 min. After 6.0 min at 97% eluent B, the column was re-equilibrated using initial conditions (10% B) between 16.1 and 19.0 min, resulting in a total runtime of 19 min. The instruments' autosampler and column oven were maintained at 10 °C and 40 °C, respectively. For analysis, a sample volume of 3 µL was injected onto the column. The MS was acquiring in scheduled multiple reaction monitoring (sMRM) applying fast polarity switching. The sMRM algorithm was used to limit the measurement of analytes around their expected retention time and thus increase dwell time and reduce the overall cycle time. Analyst® (version 1.7) software was used for data acquisition and instrument control. Data was processed using the Sciex OS software package (version 1.6).

#### Daily intake estimation

The estimated daily intake (EDI) of mycotoxins via breast milk as reported in Table S1, was based on an upper bound deterministic approach using the longitudinal exposure data from study A. All mycotoxins detected below their respective LOQ values were set to half the LOQ value (LOQ/2), while the concentration of not detected mycotoxins were assigned to half the LOD value (LOD/2), respectively. The studied time frame of 211 days was subdivided into seven different intervals. The first weeks after delivery were sectioned into four intervals of 10 days to account for a linear increase in milk intake (Table S1). Segment five included the first quarter following the second quarter in segment six. Interval 7 consisted of the last sample time point on day 211 after delivery. The infant's body weight (bw) as well as the daily breast milk intake volume (DBI) was averaged for the first and second quarter, while bw and DBI were assumed to be constant in the 10 day segments. The EDI (ng/kg bw) was calculated by multiplying the concentration of the respective mycotoxin and the DBI, which was then divided by the body weight (EC 2002).

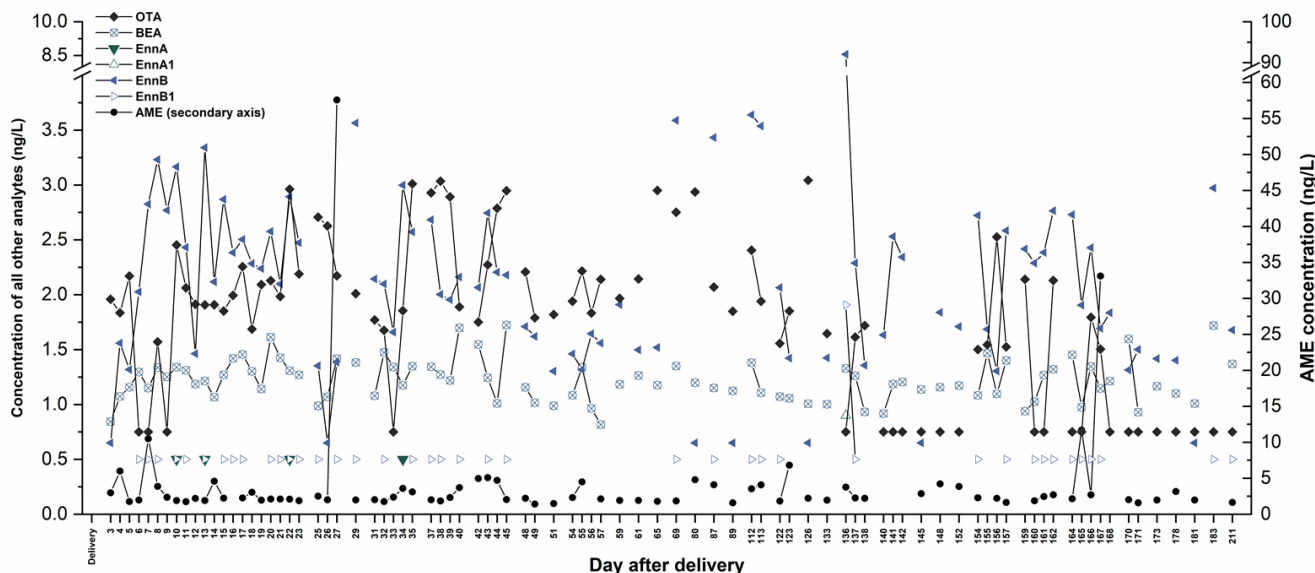

**Figure 1.** Dynamic exposure of mycotoxins in breast milk (study A): alternariol monomethyl ether (AME, ●), beauvericin (BEA, ⊠), enniatin A (EnnA, ▼), enniatin A<sub>1</sub> (EnnA<sub>1</sub>, △), enniatin B (EnnB, ◀), enniatin B<sub>1</sub> (EnnB<sub>1</sub>, ▶) and ochratoxin A (OTA, ◆) occurring in breast milk between days 3 and 211 postpartum (n=87). Line connected points indicate the changes on consecutive days. No linear time scale was chosen to plot mycotoxin concentration data of all samples in one graph. Detected analytes which were below the LOQ value were set to half the LOQ (LOQ/2). Other analytes, e.g. aflatoxin M<sub>1</sub> (AFM<sub>1</sub>; LOQ: 4.0 ng/L), zearalenone (ZEN; LOQ: 32 ng/L) and citrinin (CIT; LOQ: 6.0 ng/L) were not detected in any sample.

## Results and discussion

### Longitudinal mycotoxin exposure during early-life

Breast milk samples obtained of a single volunteer during a timeframe of 211 days after delivery (n=87) were tested for 29 mycotoxins and their key metabolites applying a highly sensitive and selective LC-MS/MS multi-analyte method in study A. To the best of our knowledge, this is the first study to examine longitudinal concentration changes of multiple mycotoxins in breast milk. Occurrence data of environmental contaminants in this bio-fluid are insufficiently understood and little is known about the transfer of most mycotoxins into breast milk in the recommended breastfeeding timeframe (Lehmann *et al.* 2018). However, potential mycotoxin levels were expected to be very low, as high food safety standards are enforced in the European Union. Our results obtained in this preliminary experiment shed a detailed picture on co-exposures and excretion patterns. As expected, mycotoxins that were identified were quantified only in the low ng/L-range. Detailed descriptive statistics on quantified mycotoxins are reported in Table 1. Mycotoxins detected during the investigated period included the rather lipophilic AME, BEA, EnnA, EnnA<sub>1</sub>, EnnB, EnnB<sub>1</sub> and OTA (Figure 1).

Quantification of AME was possible in 90% of the analyzed samples with a maximum concentration of 58 ng/L on day 27 postpartum. AME was quantified below 10 ng/L in most evaluated samples with the exception of day 7 (11 ng/L), 165 (12 ng/L) and 167 (33 ng/L) postpartum, respectively. Quantification of BEA was possible in all samples (100%) with a highly constant concentration range between 0.8 to 1.7 ng/L. The same was true for EnnB with a mean concentration of 1.9 ng/L, although on some days the concentration was below the respective LOQ value. EnnB<sub>1</sub>, which differs to EnnB only by the presence of an isobutyl residue

instead of an isopropyl residue, was found in 47% of the analyzed samples. However, except on day 136 postpartum (1.9 ng/L) EnnB<sub>1</sub> concentrations were below the LOQ value (Figure 2). On days 136, 137 and 138 postpartum the concentration of EnnB and EnnB<sub>1</sub> decreased simultaneously. Contrarily, on these days the OTA levels increased up to 1.7 ng/L.

With regards to the concentration range, our results are comparable to others who studied the occurrence of multiple mycotoxins. Andrade *et al.* (2013) analyzed aflatoxins and OTA in 224 samples obtained from different human milk banks in Brazil using LC-FD. The authors stated that OTA was not detectable in any sample with an LOQ value of 10 ng/L (Andrade *et al.* 2013). Tonon *et al.* (2018) reported a LOQ value of 12.5 ng/L using LC-MS/MS and did not detect OTA in any sample. Even though in the present study OTA was detected in all samples and quantification was possible in 74% of analyzed samples, the maximum concentration of OTA was 3 ng/L, again, highlighting the ultimate sensitivity of the method applied in the study at hand. With regards to the concentration range, our results are comparable to others who studied the occurrence of multiple mycotoxins. Andrade *et al.* (2013) analyzed aflatoxins and OTA in 224 samples obtained from different human milk banks in Brazil using LC-FD.

The authors stated that OTA was not detectable in any sample with an LOQ value of 10 ng/L (Andrade *et al.* 2013). Tonon *et al.* (2018) reported a LOQ value of 12.5 ng/L using LC-MS/MS and did not detect OTA in any sample. Even though in the present study OTA was detected in all samples and quantification was possible in 74% of analyzed samples, the maximum concentration of OTA



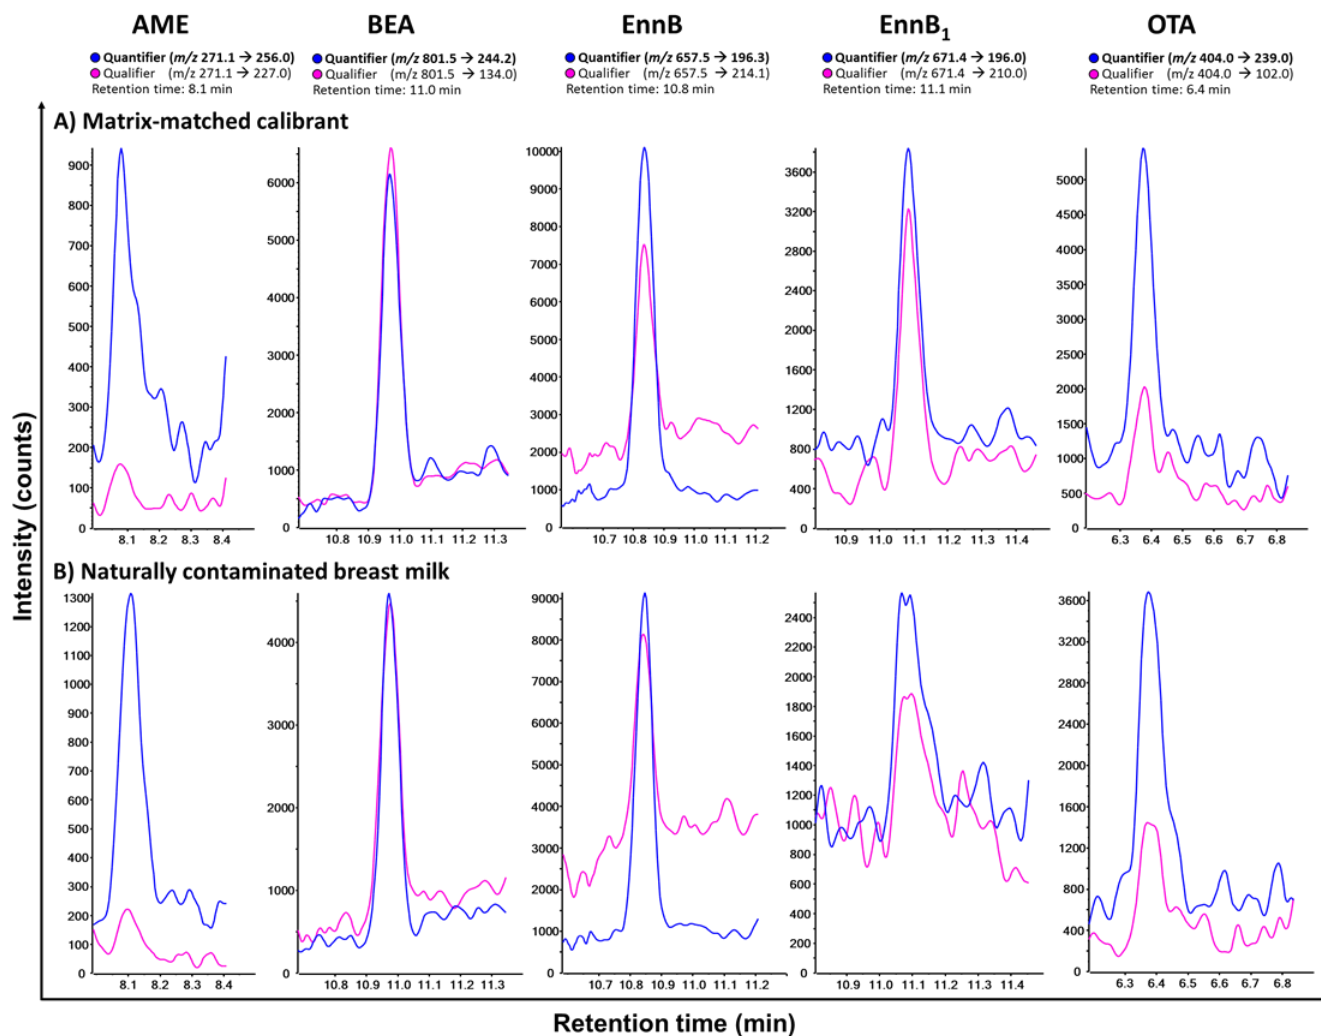

**Figure 2.** LC-MS/MS chromatograms demonstrated mycotoxin co-exposure in the Austrian breast milk sample on day 35 after delivery: alternariol monomethyl ether (AME; 3.1 ng/L), beauvericin (BEA; 1.3 ng/L), enniatin B (EnnB; 2.6 ng/L), enniatin B1 (EnnB<sub>1</sub>; <LOQ) and ochratoxin A (OTA; 3.0 ng/L). For all toxins a fortified matrix-matched calibrant (A) and the Austrian breast milk sample (B) are shown, respectively

was 3 ng/L, again, highlighting the ultimate sensitivity of the method applied in the study at hand.

Others measured breast milk OTA levels in Chilean mothers on five different occasions over the time course of four months. In contrast to our preliminary experiments described here, the authors reported a mean concentration of 52 ng/L and the highest measured concentration was observed during the first six days after delivery (Munoz *et al.* 2014). Clearly, influencing factors such as geographical region, seasonal changes or number of births may have an enormous impact on the composition of breast milk which affects mycotoxin occurrence patterns. In addition, most of the measured toxins are rather lipophilic and may be remobilized out of adipose tissue during lactation or, as it is described for OTA, have a prolonged binding to plasma albumin (Il'ichev *et al.* 2002; LaKind *et al.* 2009).

Recently, similar mycotoxin concentration levels as obtained in study A were observed in 22 breast milk samples obtained from Nigerian mothers. Those results were measured using the same methodology applied here, however, only a single time point was evaluated. In the former study, AME, BEA and OTA were the most frequently found

toxins with concentrations up to 11, 12 and 68 ng/L, respectively (Braun *et al.* unpublished; Ezekiel *et al.* unpublished). EnnB and EnnB<sub>1</sub> were detectable at lower concentrations (Braun *et al.* 2018; Braun *et al.* 2020b).

In contrast to these results, high mycotoxin levels were reported by Rubert *et al.* (2014) in breast milk obtained from Spanish mothers. Using LC coupled to a high-resolution mass spectrometer the authors found e.g. EnnB and EnnB<sub>1</sub> in two out of 21 samples at a mean concentration of 105,000 and 96,000 ng/L, respectively. In addition, ZEN was reported in 62% of the samples in a concentration range of 2,100 to 14,000 ng/L (Rubert *et al.* 2014), whereas Austrian or Nigerian samples were not contaminated with ZEN (LOD 16 ng/L) (Braun *et al.* 2020b). Hence, it is not unlikely that the Spanish study over-estimated exposure levels as no internal standards were applied.

Recently, the occurrence of very low levels of AME and BEA in breast milk was reported for the first time in Nigerian, but also in Austrian breast milk (Braun *et al.* 2020b). In the current pilot study, we could verify our findings as well as demonstrate constant chronic low background exposures. Interestingly, at day 7, 27, 165 and 167

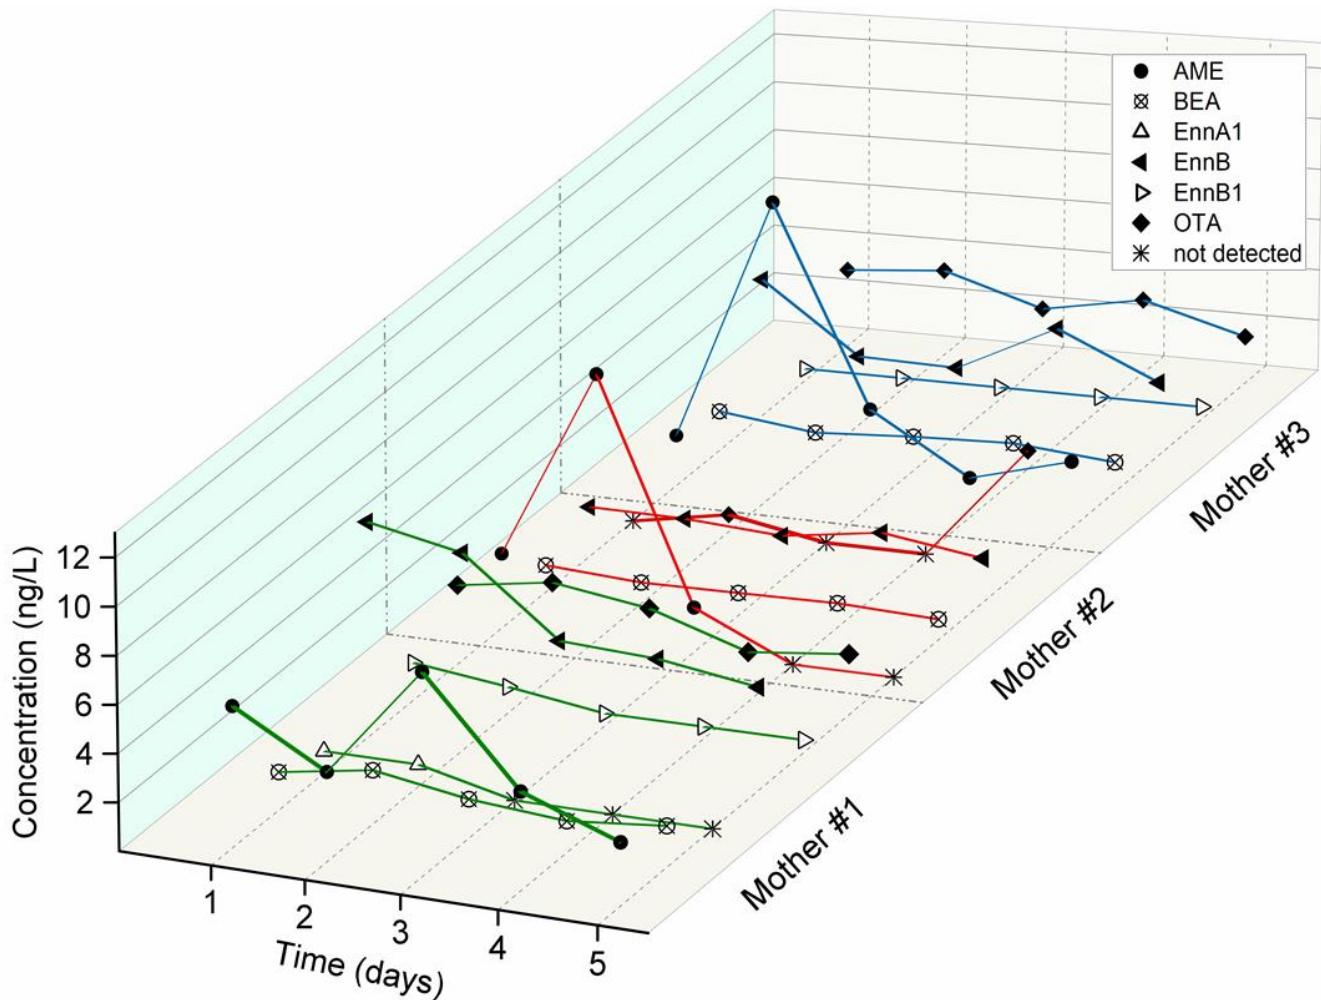

**Figure 3.** Dynamic exposure of mycotoxins in breast milk (study B): alternariol monomethyl ether (AME, ●), beauvericin (BEA, ☒), enniatin A<sub>1</sub> (EnnA<sub>1</sub>, △), enniatin B (EnnB, ▲), enniatin B<sub>1</sub> (EnnB<sub>1</sub>, ▽) and ochratoxin A (OTA, ◆) occurring in breast milk on five consecutive days from three study subjects. Detected analytes which were below the LOQ value were set to half the LOQ (LOQ/2) and the absence of displayed analytes are indicated with a star (\*). Other analytes were not detected in any sample.

postpartum the concentration of AME increased significantly. The concentration declined rapidly during the following two days. The concentration change in breast milk can most likely be traced back to food products. AME is frequently detected, e.g. in tomato sauce, sunflower seed oil, wheat flour or strawberries in a concentration range of 0.06 - 4.7 ng/g (Juan *et al.* 2016; Puntischer *et al.* 2019). In contrast to AME, BEA did not exhibit any significant peak occurrence patterns during the investigated time frame. The small concentration range and the presence of this mycotoxin in all samples suggest chronic background exposures through the diet and spot sampling is likely sufficient to obtain representative exposure data for the detected toxins. BEA is a common contaminant found in cereal based products such as wheat, corn or rice in a concentration range of 0.03 - 10 µg/kg (Covarelli *et al.* 2015; Jestoi *et al.* 2004), indicating continuous low-level exposure via food. Thus, it is likely that even with a variable diet chronic background exposure may not be avoided. Overall, the analyte concentration of the detected toxins was rather stable over the studied time period. Other mycotoxins, e.g. aflatoxins, CIT, OTB, OTα, ZEN, ZAN or their key metabolites were not detected in any sample in this experiment.

To evaluate the risk for infants, hazard information on mycotoxins reported in this pilot study and the resulting exposure (see section 0) have to be assessed. The emerging *Fusarium* toxins BEA and enniatins mediate low acute toxicity *in vivo*, exhibit ionophoric properties which lead to a dysfunction of mitochondria and are able to induce aggregation of blood platelets above a concentration of 20 µmol/L (Jestoi 2008; Tonshin *et al.* 2010). The *Alternaria* metabolite AME has received more attention in recent years due to its genotoxic properties (Ostry 2008). At micromolar concentrations (approximately 300 µg/L and higher) it has been shown *in vitro* that AME induces DNA strand breaks by topoisomerase poisoning (Fehr *et al.* 2009; Schwarz *et al.* 2012). In addition, weak estrogenic effects *in vitro* and effects on the reproductive performance of pigs and other mammals were postulated (Dellafiora *et al.* 2018; Tiemann *et al.* 2009). OTA has been investigated over the last decades in numerous studies and reviews (Haighton *et al.* 2012; O'Brien and Dietrich 2005). Key adverse effects include renal toxicity and carcinogenesis (Limonciel and Jennings 2014). In addition, neurotoxic, teratogenic and hepatotoxic effects were described in

animal models and *in vitro* (Doi and Uetsuka 2011; Malir *et al.* 2013).

#### Inter-individual mycotoxin exposure on five consecutive days in breast milk

To gain further insights into mycotoxin occurrence patterns, breast milk samples of three study subjects living in Austria were analyzed on five consecutive days (study B). The results obtained are illustrated in Figure 3. Mycotoxins identified in these 15 samples included AME, BEA, EnnA<sub>1</sub>, EnnB, EnnB<sub>1</sub> and OTA. All analyzed samples were contaminated with BEA and EnnB with maximum concentrations of 2.2 and 8.8 ng/L, respectively. The maximum concentration of 12 ng/L was detected for AME, which is in agreement with the longitudinal data. In fact, comparing the results discussed above (study A; Table S2) and the data retrieved within five days (study B; Table S3) the proof-of-principle experiments had a similar outcome. Also, EnnB<sub>1</sub> and OTA occurrence with 67% and 80% were in the range of the longitudinal detection frequency. Average and median concentration levels of individual mycotoxins did not differ significantly between the three subjects. Despite the fact that all study subjects most likely had different dietary habits, the mycotoxin occurrence pattern and concentration range were comparable. As outlined above, the diet generally is the main source of mycotoxins. The excretion into breast milk, which is considered an elimination pathway to reduce the body burden of the mother, may lead to very low chronic background exposure. However, excreted compounds are typically rather lipophilic and present in very low concentrations. For example, other environmental contaminants frequently measured and detected in breast milk include dioxins, polychlorinated biphenyls (PCBs) and perfluoroalkyl substances (PFAS). Their concentration in European breast milk was reported up to 376 ng/L and 114 ng/kg for perfluorooctanoic acid (PFOS) and WHO toxicity equivalent levels for dioxin-like compounds, respectively (Anderson *et al.* 2019; Antignac *et al.* 2016; Cariou *et al.* 2015; van den Berg *et al.* 2017). In contrast to these reports, our experiment highlights the low abundance of mycotoxins in breast milk.

#### Exposure assessment

The exposure of the infant in study A was calculated using time intervals to account for the differences in milk consumption and increase in body weight. The infants' body weight was compared to weight-for-age standards published by the WHO (WHO 2006). Here, the initial weight after delivery and six weeks later matched the published mean weight-for-age values. In the time period of four to six months the infants' body weight was slightly reduced compared to the mean value. Milk consumption was comparable to previous studies estimating the milk volume in the first months of life (da Costa *et al.* 2010; Kent *et al.* 1999; Neville *et al.* 1988; Salazar *et al.* 2000). The mycotoxin exposure estimates in breast milk were gained using an upper bound deterministic approach and are reported in Table 2.

Overall, the estimated exposure towards mycotoxins was very low and the highest EDI value was found for AME with 0.95 ng/kg bw per day in interval 3. However, this value can be reasonably explained and attributed to the

AME peak concentration found at day 27 postpartum. AME exposure estimates in other evaluated intervals were even lower, although in most time intervals the highest estimated intake was determined for AME. For the exposure estimates of BEA, EnnA, EnnA<sub>1</sub>, EnnB and EnnB<sub>1</sub> a clear trend was observed. Here, the average estimated intake increased during the first two months of life. Similarly, an increase in OTA exposure was observed up to 0.38 ng/kg bw per day, followed by a decrease to 0.12 ng/kg bw per day in the subsequent intervals. Most of these findings and the increase in exposure during the first two months can be explained by the increasing milk consumption, while the body weight and the mycotoxin concentration in breast milk were rather stable over time.

Since it is known that infants have a less developed immune system, and limited metabolic capacities during development in the first months and years of life, this group is more susceptible towards toxic effects in general. Consequently, the European Food Safety Authority (EFSA) concluded to lower tolerable daily intake (TDI) values of substances present in food intended for infants within the first four months of life to account for the developing infant (EFSA and Hardy 2017). In addition, the EC regulation 1881/2006 specifically addresses food intended for infant consumption with MTLs being significantly lower compared to foodstuff intended for adults (EC 2006).

Of the detected toxins in the present study, only OTA is regulated in food and a tolerable weekly intake (TWI) of 120 ng/kg bw was derived by EFSA (EFSA 2010). The maximum estimated upper bound exposure during the longitudinal investigation was 0.52 ng OTA/kg bw at day 126 postpartum. Here, the OTA exposure did not exceed the hypothetically infant corrected TWI according to the recommendation by EFSA (33 ng/kg bw) or a conservative TWI of 21 ng/kg bw as derived by Kuiper-Goodman *et al.* (2010). Thus, it was possible to conclude that the infant corrected TWI values were clearly not exceeded in the studied time frame. Even if the established guideline values would have been exceeded, the benefits of breast milk clearly outweigh the potential risks of a low mycotoxin exposure.

In comparison to our estimates, others who derived OTA exposure for Chilean infants (Munoz *et al.* 2014) reported nearly 100-fold higher EDI values with average values between 5 to 12 ng/kg bw per day. However, worldwide reported occurrence data of breast milk OTA levels vary considerably and likely explain these differences in EDI values. As discussed above, complex lactational transfer processes, changes in breast milk composition, demand of the infant and mammary gland physiology are key factors for the transmission of substances to breast milk (LaKind *et al.* 2009). Comparing our preliminary results with the estimates derived from Nigerian breast milk (Braun *et al.* unpublished; Braun *et al.* 2018), the EDI values of BEA, EnnB and OTA were around 12x, 6x and 30x lower in this study, respectively. The main reason for this divergence is the maximum concentration of mycotoxins measured which were, as one would estimate, slightly higher for all three toxins in Nigerian breast milk. The mycoestrogen ZEN was not detected in any sample in this pilot study (Braun *et al.* 2018; Braun *et al.* 2020b). Only in one pooled Austrian breast milk sample obtained from a hospital milk



**Table 2.** Estimated upper bound exposure to mycotoxins of infants based on the longitudinal occurrence data (Table S2), infants' body weight and intake rate of breast milk in the respective time interval (Table S1).

| Interval | Days postpartum      | Alternariol monomethyl ether (ng/kg bw/d) | Beauvericin | Enniatin A | Enniatin A <sub>1</sub> | Enniatin B | Enniatin B <sub>1</sub> | Ochratoxin A |
|----------|----------------------|-------------------------------------------|-------------|------------|-------------------------|------------|-------------------------|--------------|
| 1        | 0-9                  | 0.12                                      | 0.03        | 0.01       | 0.01                    | 0.06       | 0.01                    | 0.04         |
| 2        | 10-19                | 0.15                                      | 0.09        | 0.02       | 0.03                    | 0.17       | 0.03                    | 0.14         |
| 3        | 20-29                | 0.95                                      | 0.14        | 0.03       | 0.05                    | 0.22       | 0.05                    | 0.25         |
| 4        | 30-39                | 0.35                                      | 0.19        | 0.04       | 0.06                    | 0.31       | 0.05                    | 0.31         |
| 5        | 40-89 <sup>a</sup>   | 0.46                                      | 0.20        | 0.04       | 0.08                    | 0.31       | 0.05                    | 0.38         |
| 6        | 112-183 <sup>a</sup> | 0.57                                      | 0.20        | 0.04       | 0.08                    | 0.37       | 0.07                    | 0.22         |
| 7        | 211 <sup>a</sup>     | 0.27                                      | 0.23        | 0.04       | 0.07                    | 0.28       | 0.08                    | 0.12         |

<sup>a</sup> No samples were collected between day 89 to 112 and 183 to 211 postpartum, respectively.

bank, measured in our lab, ZEN was detected at the LOD value (Braun *et al.* 2020b).

These data suggest that most reports overestimate infant's exposure to mycotoxins. For example, Massart *et al.* (2016) reported a mean ZEN concentration of 1130 ng/L, which may be the result of using less specific analytical approaches. Here, cross-reactivity reactions (ELISA) or interfering peaks (LC-FD) may be interpreted as positive signals. In contrast, LC-MS/MS approaches clearly benefit by using stable isotope reference standards to minimize the probability of reporting false-positives. Thus, our pilot study revealed that overall only the most sensitive and rather lipophilic analytes were identified in very low concentration levels. Still, low-dose combinatory effects of mycotoxins have to be evaluated in detail as combinations of mycotoxins have shown to exert synergistic or antagonistic effects *in vitro* (Vejdovszky *et al.* 2017; Vejdovszky *et al.* 2016). In our experiments, these mycotoxins were either not detected (ZEN,  $\alpha$ -ZEL and  $\beta$ -ZEL) or were not extractable with the utilized method (AOH). However, exposure in early developmental stages may be possible, as it is known that e.g. ZEN and its metabolites can be transferred across the human placental barrier (Warth *et al.* 2019). In addition, infants might be exposed to other compounds such as xenoestrogens as shown recently (Preindl *et al.* 2019). In light of the new exposome paradigm, low-dose mixture effects of mycotoxins with persistent organic pollutants like dioxins or PFOS may be relevant and need to be addressed in the future to evaluate their combined effects in a holistic manner.

However, replacing breast milk by feeding alternatives like infant formula may lead to an increased risk for the infant. We could recently demonstrate that infants are exposed to mycotoxins via complementary infant food to a higher extend than via breast milk (Braun *et al.* 2020a). Consequently, potential low mycotoxin exposure via breast milk should clearly not be a factor to reduce or avoid breastfeeding.

### Strengths and Limitations

The main strength of the study is the assessment of longitudinal exposure data (study A) of a multitude of mycotoxins and key metabolites in this important bio-fluid. These data were used to calculate the exposure of the infant by taking actually measured milk consumption and body weight into account. In addition, the results of study A could be verified by proof-of-principle experiments in a shorter time frame (study B). Based on these data it was

possible to assess inter-day and inter-individual mycotoxin occurrence patterns. The main limitation of the presented data is that the sample preparation procedure was not suitable to extract certain toxins (e.g. the polar trichothecenes DON, NIV, the fumonisins, AOH, and the AFB<sub>1</sub>-N7-guanine adduct) as described before (Braun *et al.* 2020b). However, these are generally more polar and not very likely to be transferred to breast milk without a suitable carrier.

### Conclusion and outlook

In this paper we report the first comprehensive longitudinal investigation of mycotoxin mixtures in breast milk (study A). Our findings indicated that mycotoxin concentrations in Austrian breast milk are likely low. However, these results have to be verified in larger studies in the future. Regulated mycotoxins such as aflatoxin, ZEN or their key metabolites were not detected in any sample. Only rather lipophilic and most sensitive analytes were found in very low concentration ranges suggesting chronic background exposures through the diet. In light of the preliminary data gained in study B, inter- and intraindividual effects were assessed and demonstrated to be minimal. Thus, spot sampling was deemed to be sufficient to retrieve exposure data for the detected toxins.

Based on the insights gained in this pilot study, the exposure of infants to mycotoxins via Austrian breast milk were estimated to be negligible. When comparing previous EDI values to our calculations, we conclude that most published data overestimated the exposure of infants to mycotoxins. However, factors influencing contamination patterns in breast milk have to be further investigated using large-scale biomonitoring studies to assess intra-, inter-individual and geographical aspects. In addition, our findings of low chronic background exposures with mostly non-regulated toxins have to be verified in large-scale human biomonitoring (HBM) studies. These should aim to generate exposome-scale data by non-targeted mass spectrometry-based approaches, to better understand relevant factors and assess combinatory effects of e.g. mycoestrogens. Overall, the potential low-level presence of mycotoxins clearly does not warrant to discourage mothers from breastfeeding.

### Declaration of interest

None.



## Acknowledgements

The authors want to gratefully thank all participants who provided samples. We would like to acknowledge Ipek Savaş and Patrick Windisch for or skillful practical assistance. In addition, we want to acknowledge the Mass Spectrometry Centre (MSC) of the Faculty of Chemistry at the University of Vienna and Sciex for providing mass spectrometric instrumentation. This work was performed with the financial support of the University of Vienna and cofunded by the Austrian Science Fund (FWF): P 33188-B.

## Appendix: Supplementary material

Additional information is available on infant's body weight and milk consumption (Table S1), individual sample concentration levels of mycotoxins found in study A (Table S2) and study B (Table S3).

## AUTHOR INFORMATION

### Corresponding Author

\*Benedikt Warth, University of Vienna, Faculty of Chemistry, Department of Food Chemistry and Toxicology, Währinger Straße 38, 1090 Vienna, Austria.  
Phone: +43 1 4277 70806  
E-mail: benedikt.warth@univie.ac.at.

## REFERENCES

- Anderson, J.K.; Luz, A.L.; Goodrum, P.; Durda, J. Perfluorohexanoic acid toxicity, part II: Application of human health toxicity value for risk characterization. *Regul Toxicol Pharmacol* 2019;103:10-20
- Andrade, P.D.; Gomes da Silva, J.L.; Caldas, E.D. Simultaneous analysis of aflatoxins B1, B2, G1, G2, M1 and ochratoxin A in breast milk by high-performance liquid chromatography/fluorescence after liquid-liquid extraction with low temperature purification (LLE-LTP). *J Chromatogr A* 2013;1304:61-68
- Antignac, J.P.; Main, K.M.; Virtanen, H.E.; Boquien, C.Y.; Marchand, P.; Venisseau, A.; Guiffard, I.; Bichon, E.; Wohlfahrt-Veje, C.; Legrand, A.; Boscher, C.; Skakkebaek, N.E.; Toppari, J.; Le Bizec, B. Country-specific chemical signatures of persistent organic pollutants (POPs) in breast milk of French, Danish and Finnish women. *Environ Pollut* 2016;218:728-738
- Barker, D. Fetal programming: Influences on Development and Disease in Later Life. In: Series NM. ed Dekker M. New York, NY; 2000
- Bateson, P.; Barker, D.; Clutton-Brock, T.; Deb, D.; D'Udine, B.; Foley, R.A.; Gluckman, P.; Godfrey, K.; Kirkwood, T.; Lahr, M.M.; McNamara, J.; Metcalfe, N.B.; Monaghan, P.; Spencer, H.G.; Sultan, S.E. Developmental plasticity and human health. *Nature* 2004;430:419-421
- Beasley, V.R. *Trichothecene Mycotoxicosis Pathophysiologic Effects* (1989): Volume 1 ed^eds: CRC Press; 2017
- Bennett, J.W.; Klich, M. Mycotoxins. *Clin Microbiol Rev* 2003;16:497-516
- Braun, D.; Eiser, M.; Puntischer, H.; Marko, D.; Warth, B. Natural contaminants in infant food: The case of regulated and emerging mycotoxins. under review 2020a;
- Braun, D.; Ezekiel, C.N.; Abia, W.A.; Waldhoer, T.; Erber, A.C.; Marko, D.; Warth, B. Cross-sectional mycotoxin-mixture assessment in Nigeria: From mothers' meal to infants' urine. unpublished;
- Braun, D.; Ezekiel, C.N.; Abia, W.A.; Wisgrill, L.; Degen, G.H.; Turner, P.C.; Marko, D.; Warth, B. Monitoring Early Life Mycotoxin Exposures via LC-MS/MS Breast Milk Analysis. *Anal Chem* 2018;90:14569-14577
- Braun, D.; Ezekiel, C.N.; Marko, D.; Warth, B. Exposure to Mycotoxin-Mixtures via Breast Milk: An Ultra-Sensitive LC-MS/MS Biomonitoring Approach. *ChemRxiv preprint* 2020b;
- Cariou, R.; Veyrand, B.; Yamada, A.; Berrebi, A.; Zalko, D.; Durand, S.; Pollono, C.; Marchand, P.; Leblanc, J.-C.; Antignac, J.-P.; Le Bizec, B. Perfluoroalkyl acid (PFAA) levels and profiles in breast milk, maternal and cord serum of French women and their newborns. *Environ Int* 2015;84:71-81
- Covarelli, L.; Beccari, G.; Prodi, A.; Generotti, S.; Etruschi, F.; Meca, G.; Juan, C.; Mañes, J. Biosynthesis of beauvericin and enniatins in vitro by wheat *Fusarium* species and natural grain contamination in an area of central Italy. *Food Microbiology* 2015;46:618-626
- da Costa, T.H.M.; Haisma, H.; Wells, J.C.K.; Mander, A.P.; Whitehead, R.G.; Bluck, L.J.C. How Much Human Milk Do Infants Consume? Data from 12 Countries Using a Standardized Stable Isotope Methodology. *The Journal of Nutrition* 2010;140:2227-2232
- Dellafiora, L.; Warth, B.; Schmidt, V.; Del Favero, G.; Mikula, H.; Fröhlich, J.; Marko, D. An integrated in silico/in vitro approach to assess the xenoestrogenic potential of *Alternaria* mycotoxins and metabolites. *Food Chem* 2018;248:253-261
- Doi, K.; Uetsuka, K. Mechanisms of Mycotoxin-Induced Neurotoxicity through Oxidative Stress-Associated Pathways. *Int J Mol Sci* 2011;12:5213-5237
- EC. European Commission. Assessment of Dietary Intake of Ochratoxin A by the Population of EU Member States; Report of Experts Participating in Task 3.2.7. Reports on Tasks for Scientific Cooperation Directorate-General Health and Consumer Protection of the European Commission 2002
- EC. Commission Regulation (EC) No 1881/2006 Setting Maximum Levels for Certain Contaminants in Foodstuffs. *European Union Commission, Off J Eur Communities L*; 2006
- EFSA. Statement on recent scientific information on the toxicity of Ochratoxin A. *EFSA Journal* 2010;8:1626
- EFSA; Hardy, A. Guidance on the risk assessment of substances present in food intended for infants below 16 weeks of age. *EFSA Journal*; 2017
- EFSA; Knudsen, E.S. Risks to human and animal health related to the presence of deoxynivalenol and its acetylated and modified forms in food and feed. *EFSA Journal*; 2017
- Eskola, M.; Kos, G.; Elliott, C.T.; Hajslova, J.; Mayar, S.; Krska, R. Worldwide contamination of food-crops with mycotoxins: Validity of the widely cited 'FAO estimate' of 25. *Crit Rev Food Sci Nutr* 2019;1-17
- Ezekiel, C.N.; Abia, W.A.; Braun, D.; Sarkanj, B.; Ayeni, K.I.; Oyedele, O.A.; Michael-Chikezie, E.C.; Ezekiel, V.C.; Mark, B.; Ahuchaogu, C.P.; Krska, R.; Sulyok, M.; Turner, P.C.; Warth, B. Comprehensive mycotoxin exposure biomonitoring in breastfed and non-exclusively breastfed Nigerian children. unpublished;
- Fehr, M.; Pahlke, G.; Fritz, J.; Christensen, M.O.; Boege, F.; Altemoller, M.; Podlech, J.; Marko, D. *Alternariol* acts as a topoisomerase poison, preferentially affecting the I $\alpha$  isoform. *Mol Nutr Food Res* 2009;53:441-451
- Gong, Y.; Hounsa, A.; Egal, S.; Turner, P.C.; Sutcliffe, A.E.; Hall, A.J.; Cardwell, K.; Wild, C.P. Postweaning exposure to aflatoxin results in impaired child growth: a longitudinal study in Benin, West Africa. *Environ Health Perspect* 2004;112:1334-1338
- Gong, Y.Y.; Wilson, S.; Mwatha, J.K.; Routledge, M.N.; Castelino, J.M.; Zhao, B.; Kimani, G.; Curtis Kariuki, H.; Vennervald, B.J.; Dunne, D.W.; Wild, C.P. Aflatoxin exposure may contribute to chronic hepatomegaly in Kenyan school children. *Environ Health Perspect* 2012;120:893-896
- Haighton, L.A.; Lynch, B.S.; Magnuson, B.A.; Nestmann, E.R. A reassessment of risk associated with dietary intake of ochratoxin A based on a lifetime exposure model. *Crit Rev Toxicol* 2012;42:147-168
- Horta, B.L.; Bahl, R.; Martines, J.C.; Victora, C.G. Evidence on the long-term effects of breastfeeding: Systematic reviews and meta-analyses. *World Health Organization*. Accessed 10.01.2020; 2007
- Il'ichev, Y.V.; Perry, J.L.; Simon, J.D. Interaction of Ochratoxin A with Human Serum Albumin. Preferential Binding of the Dianion and pH Effects. *The Journal of Physical Chemistry B* 2002;106:452-459
- Jäger, S.; Jacobs, S.; Kröger, J.; Fritsche, A.; Schienkiewitz, A.; Rubin, D.; Boeing, H.; Schulze, M.B. Breast-feeding and maternal risk of type 2 diabetes: a prospective study and meta-analysis. *Diabetologia* 2014;57:1355-1365
- Jestoi, M. Emerging *Fusarium*-mycotoxins fusaproliferin, beauvericin, enniatins, and moniliformin—A review. *Crit Rev Food Sci Nutr* 2008;48:21-49

- Jestoi, M.; Somma, M.C.; Kouva, M.; Veijalainen, P.; Rizzo, A.; Ritieni, A.; Pelttonen, K. Levels of mycotoxins and sample cytotoxicity of selected organic and conventional grain-based products purchased from Finnish and Italian markets. *Mol Nutr Food Res* 2004;48:299-307
- Juan, C.; Chamari, K.; Oueslati, S.; Mañes, J. Rapid Quantification Method of Three *Alternaria* Mycotoxins in Strawberries. *Food Analytical Methods* 2016;9:1573-1579
- Kent, J.C.; Mitoulas, L.; Cox, D.B.; Owens, R.A.; Hartmann, P.E. Breast volume and milk production during extended lactation in women. *Exp Physiol* 1999;84:435-447
- Kowalska, K.; Habrowska-Górczyńska, D.; Urbanek, K.; Domińska, K.; Piastowska-Ciesielska, A. Estrogen receptor  $\alpha$  is crucial in zearalenone-induced invasion and migration of prostate cancer cells. *Toxins* 2018;10:98
- Kuiper-Goodman, T.; Hiltz, C.; Billiard, S.; Kiparissis, Y.; Richard, I.; Hayward, S. Health risk assessment of ochratoxin A for all age-sex strata in a market economy. *Food Addit Contam* 2010;27:212-240
- LaKind, J.S.; Berlin, C.M., Jr.; Sjodin, A.; Turner, W.; Wang, R.Y.; Needham, L.L.; Paul, I.M.; Stokes, J.L.; Naiman, D.Q.; Patterson, D.G., Jr. Do human milk concentrations of persistent organic chemicals really decline during lactation? Chemical concentrations during lactation and milk/serum partitioning. *Environ Health Perspect* 2009;117:1625-1631
- LaKind, J.S.; Lehmann, G.M.; Davis, M.H.; Hines, E.P.; Marchitti, S.A.; Alcalá, C.; Lorber, M. Infant Dietary Exposures to Environmental Chemicals and Infant/Child Health: A Critical Assessment of the Literature. *Environ Health Perspect* 2018;126:96002
- Lehmann, G.M.; LaKind, J.S.; Davis, M.H.; Hines, E.P.; Marchitti, S.A.; Alcalá, C.; Lorber, M. Environmental Chemicals in Breast Milk and Formula: Exposure and Risk Assessment Implications. *Environ Health Perspect* 2018;126:96001
- Limonciel, A.; Jennings, P. A review of the evidence that ochratoxin A is an Nrf2 inhibitor: implications for nephrotoxicity and renal carcinogenicity. *Toxins* 2014;6:371-379
- Malir, F.; Ostry, V.; Novotna, E. Toxicity of the mycotoxin ochratoxin A in the light of recent data. *Toxin Reviews* 2013;32:19-33
- Mandy, M.; Nyirenda, M. Developmental Origins of Health and Disease: the relevance to developing nations. *International health* 2018;10:66-70
- Massart, F.; Micillo, F.; Rivezzi, G.; Perrone, L.; Baggiani, A.; Miccoli, M.; Meucci, V. Zearalenone screening of human breast milk from the Naples area. *Toxicol Environ Chem* 2016;98:128-136
- Munoz, K.; Blaszkewicz, M.; Campos, V.; Vega, M.; Degen, G.H. Exposure of infants to ochratoxin A with breast milk. *Arch Toxicol* 2014;88:837-846
- Neville, M.C.; Keller, R.; Seacat, J.; Lutes, V.; Neifert, M.; Casey, C.; Allen, J.; Archer, P. Studies in human lactation: milk volumes in lactating women during the onset of lactation and full lactation. *The American Journal of Clinical Nutrition* 1988;48:1375-1386
- O'Brien, E.; Dietrich, D.R. Ochratoxin A: The continuing enigma. *Crit Rev Toxicol* 2005;35:33-60
- Ostry, V. *Alternaria* mycotoxins: an overview of chemical characterization, producers, toxicity, analysis and occurrence in foodstuffs. *World Mycotoxin Journal* 2008;1:175-188
- Palmer, J.R.; Viscidi, E.; Troester, M.A.; Hong, C.-C.; Schedin, P.; Bethea, T.N.; Bandera, E.V.; Borges, V.; McKinnon, C.; Haiman, C.A.; Lunetta, K.; Kolonel, L.N.; Rosenberg, L.; Olshan, A.F.; Ambrosone, C.B. Parity, lactation, and breast cancer subtypes in African American women: results from the AMBER Consortium. *J Natl Cancer Inst* 2014;106:dju237; 231-238
- Preindl, K.; Braun, D.; Aichinger, G.; Sieri, S.; Fang, M.; Marko, D.; Warth, B. A Generic Liquid Chromatography-Tandem Mass Spectrometry Exposome Method for the Determination of Xenoestrogens in Biological Matrices. *Anal Chem* 2019;91:11334-11342
- Puntscher, H.; Cobankovic, I.; Marko, D.; Warth, B. Quantitation of free and modified *Alternaria* mycotoxins in European food products by LC-MS/MS. *Food Control* 2019;102:157-165
- Rubert, J.; Leon, N.; Saez, C.; Martins, C.P.B.; Godula, M.; Yusa, V.; Manes, J.; Soriano, J.M.; Soler, C. Evaluation of mycotoxins and their metabolites in human breast milk using liquid chromatography coupled to high resolution mass spectrometry. *Anal Chim Acta* 2014;820:39-46
- Salazar, G.; Vio, F.; García, C.; Aguirre, E.; Coward, W.A. Energy requirements in Chilean infants. *Archives of Disease in Childhood - Fetal and Neonatal Edition* 2000;83:F120-F123
- Schatzmayr, G.; Streit, E. Global occurrence of mycotoxins in the food and feed chain: facts and figures. *World Mycotoxin Journal* 2013;6:213-222
- Schwarz, C.; Kreutzer, M.; Marko, D. Minor contribution of alternariol, alternariol monomethyl ether and tenuazonic acid to the genotoxic properties of extracts from *Alternaria alternata* infested rice. *Toxicol Lett* 2012;214:46-52
- Sengling Cebin Coppà, C.F.; Mousavi Khaneghah, A.; Alvito, P.; Assunção, R.; Martins, C.; Eş, I.; Gonçalves, B.L.; Valganon de Neeff, D.; Sant'Ana, A.S.; Corassin, C.H.; Oliveira, C.A.F. The occurrence of mycotoxins in breast milk, fruit products and cereal-based infant formula: A review. *Trends Food Sci Technol* 2019;92:81-93
- Shirima, C.P.; Kimanya, M.E.; Routledge, M.N.; Srey, C.; Kinabo, J.L.; Humpff, H.-U.; Wild, C.P.; Tu, Y.-K.; Gong, Y.Y. A Prospective Study of Growth and Biomarkers of Exposure to Aflatoxin and Fumonisin during Early Childhood in Tanzania. *Environ Health Perspect* 2015;123:173-178
- Thornburg, K.L.; Shannon, J.; Thuillier, P.; Turker, M.S. In Utero Life and Epigenetic Predisposition for Disease. In: *Adv Genet.* eds, Herceg Z., Ushijima T.: Academic Press; 2010
- Tiemann, U.; Tomek, W.; Schneider, F.; Müller, M.; Pöhland, R.; Vanselow, J. The mycotoxins alternariol and alternariol methyl ether negatively affect progesterone synthesis in porcine granulosa cells in vitro. *Toxicol Lett* 2009;186:139-145
- Tonon, K.M.; Reiter, M.G.R.; Savi, G.D.; Scussel, V.M. Human milk AFM1, OTA, and DON evaluation by liquid chromatography tandem mass spectrometry and their relation to the Southern Brazil nursing mothers' diet. *Journal of Food Safety* 2018;38:e12452
- Tonshin, A.A.; Teplova, V.V.; Andersson, M.A.; Salkinoja-Salonen, M.S. The *Fusarium* mycotoxins enniatins and beauvericin cause mitochondrial dysfunction by affecting the mitochondrial volume regulation, oxidative phosphorylation and ion homeostasis. *Toxicology* 2010;276:49-57
- Turner, P.C.; Moore, S.E.; Hall, A.J.; Prentice, A.M.; Wild, C.P. Modification of immune function through exposure to dietary aflatoxin in Gambian children. *Environ Health Perspect* 2003;111:217-220
- van den Berg, M.; Kypke, K.; Kotz, A.; Tritscher, A.; Lee, S.Y.; Magulova, K.; Fiedler, H.; Malisch, R. WHO/UNEP global surveys of PCDDs, PCDFs, PCBs and DDTs in human milk and benefit-risk evaluation of breastfeeding. *Arch Toxicol* 2017;91:83-96
- Vejdovszky, K.; Hahn, K.; Braun, D.; Warth, B.; Marko, D. Synergistic estrogenic effects of *Fusarium* and *Alternaria* mycotoxins in vitro. *Arch Toxicol* 2017;91:1447-1460
- Vejdovszky, K.; Warth, B.; Sulyok, M.; Marko, D. Non-synergistic cytotoxic effects of *Fusarium* and *Alternaria* toxin combinations in Caco-2 cells. *Toxicol Lett* 2016;241:1-8
- Warth, B.; Braun, D.; Ezekiel, C.N.; Turner, P.C.; Degen, G.H.; Marko, D. Biomonitoring of mycotoxins in human breast milk: current state and future perspectives. *Chem Res Toxicol* 2016;29:1087-1097
- Warth, B.; Preindl, K.; Manser, P.; Wick, P.; Marko, D.; Buerki-Thurnherr, T. Transfer and Metabolism of the Xenoestrogen Zearalenone in Human Perfused Placenta. *Environ Health Perspect* 2019;127:107004
- WHO. World Health Organization Multicentre Growth Reference Study Group. WHO Child Growth Standards: Length/height-for-age, weight-for-age, weight-for-length, weight-for-height and body mass index-for-age: Methods and development. World Health Organization; 2006
